# Supplementary material for: Plasmodium yoelii Erythrocyte Binding Like Protein Interacts With Basigin, an Erythrocyte Surface Protein
Source: Front Cell Infect Microbiol. 2021 Apr 14;11:656620. doi: 10.3389/fcimb.2021.656620 (PMC8079763; doi:10.3389/fcimb.2021.656620)
Supplement: Supplementary file 4 [file Table_3.xlsx]

## Sheet: 1st screening
Supplementary Table S3
Library of recombinant mouse erythrocyte proteins screened for interaction with PyEBL ranked by AlphaScreen Counts
FANTOM Clone ID	Name	AlphaScreen Count (ASC)		AS Signal
2010315L10	RIKEN cDNA 2010315L10 gene	1616		4.17949
1010001P20	ubiquitin-conjugating enzyme E2I	1200		2.84615
2410038N06	chaperonin subunit 4 (delta)	1152		2.69231
2410041O21	peroxiredoxin 2	1096		2.51282
4933417M14	Flotillin 2	1084		2.47436
I730061G06	chaperonin subunit 3 (gamma)	1052		2.37179
0610008G13	basigin	1016		2.25641
2510009G17	potassium intermediate/small conductance calcium-activated channel, subfamily N, member 4	916		1.9359
0610007B22	tropomyosin 1, alpha	872		1.79487
0610006J14	ribosomal protein S27a	836		1.67949
0710007A22	stromal cell derived factor receptor 1	784		1.51282
4432406O14	Kell blood group	772		1.47436
2510029O03	capping protein (actin filament) muscle Z-line, beta	744		1.38462
D330025I23	RAB8B, member RAS oncogene family	656		1.10256
3110001E05	valosin containing protein	640		1.05128
3010001O15	v-ral simian leukemia viral oncogene homolog A (ras related)	632		1.02564
3300001L20	proteasome (prosome, macropain) 26S subunit, ATPase, 6	628		1.01282
2510022L14	actin, beta, cytoplasmic	624		1
0610030G24	RAB14, member RAS oncogene family	604		0.935897
9530003J23	RIKEN cDNA 9530003J23 gene	596		0.910256
K330004H13	RAB15, member RAS oncogene family	596		0.910256
1110008M22	RIKEN cDNA 2810002D13 gene	588		0.884615
I920066L02	pyruvate kinase, muscle	588		0.884615
C920024C15	tyrosine 3-monooxygenase/tryptophan 5-monooxygenase activation protein, zeta polypeptide	580		0.858974
I830026B02	serine/arginine-rich protein specific kinase 1	572		0.833333
1810041F13	protein disulfide isomerase associated 2	556		0.782051
4732489M10	thyroid stimulating hormone receptor	556		0.782051
A930028D15	RAB8A, member RAS oncogene family	556		0.782051
8030492A12	nicastrin	552		0.769231
0610040G01	syntaxin 7	548		0.75641
4933431L17	erythrocyte protein band 4.1	548		0.75641
0610008G16	carbonic anhydrase 2	540		0.730769
4732465P09	guanosine diphosphate (GDP) dissociation inhibitor 1	536		0.717949
I920161I12	synaptosomal-associated protein 91	532		0.705128
2510031K13	ATP synthase, H+ transporting mitochondrial F1 complex, beta subunit	528		0.692308
9930024J01	solute carrier family 27 (fatty acid transporter), member 4	520		0.666667
E430024A07	methylenetetrahydrofolate dehydrogenase (NADP+ dependent), methenyltetrahydrofolate cyclohydrolase, formyltetrahydrofolate synthase	516		0.653846
6430529B06	DnaJ (Hsp40) homolog, subfamily C, member 5	512		0.641026
I420028K21	protein kinase C substrate 80K-H	512		0.641026
F830031E13	Ras-related protein Rab-35 (Rab-1C) (GTP-binding protein RAY) homolog [Homo sapiens]	512		0.641026
1110008I04	vesicle-associated membrane protein, associated protein A	508		0.628205
0610016L08	diaphorase 1 (NADH)	504		0.615385
I830030N13	multiple inositol polyphosphate histidine phosphatase 1	504		0.615385
9830118D19	lactotransferrin	500		0.602564
I920058E07	carbonyl reductase 1	500		0.602564
1500000E05	aldolase 3, C isoform	496		0.589744
9130004G24	F11 receptor	496		0.589744
0610008P05	peptidylprolyl isomerase B	492		0.576923
5730450C07	copine III	488		0.564103
G530015I05	guanine nucleotide binding protein, alpha 13	488		0.564103
1810061C01	signal sequence receptor, delta	476		0.525641
2610029D04	synaptosomal-associated protein 23	476		0.525641
4930434I05	RIKEN cDNA 0710001P09 gene	476		0.525641
5730420O09	guanine nucleotide binding protein, alpha inhibiting 3	476		0.525641
5730455E12	annexin A7	472		0.512821
I830043E20	CD47 antigen (Rh-related antigen, integrin-associated signal transducer)	472		0.512821
1200005K12	Lutheran blood group (Auberger b antigen included)	468		0.5
1810014F17	NADH dehydrogenase (ubiquinone) 1 beta subcomplex, 2	468		0.5
2410002I22	protein (peptidyl-prolyl cis/trans isomerase) NIMA-interacting, 4 (parvulin)	468		0.5
5730411M01	carnitine palmitoyltransferase 1a, liver	468		0.5
A830097L06	thrombospondin 1	464		0.487179
0610030O01	phosphofructokinase, muscle	452		0.448718
2400003C12	apolipoprotein E	452		0.448718
F730310M08	ATPase, Cu++ transporting, alpha polypeptide	452		0.448718
1200015M03	endoplasmic reticulum protein 29	448		0.435897
6330592M02	reticulon 3	448		0.435897
K0C0005O03	solute carrier family 4 (anion exchanger), member 1	448		0.435897
1300018L09	dihydrodiol dehydrogenase (dimeric)	444		0.423077
2010013E10	claudin 15	444		0.423077
5330435N12	tetraspanin 14	444		0.423077
1200005B17	ATP-binding cassette, sub-family B (MDR/TAP), member 6	440		0.410256
3322402M22	lectin, mannose-binding 2	440		0.410256
4432414K09	adducin 2 (beta)	440		0.410256
5730456G17	golgi autoantigen, golgin subfamily a, 7	440		0.410256
5730586E07	heat shock protein 1, beta	440		0.410256
9830134O04	neuropathy target esterase	440		0.410256
B230336L16	RIKEN cDNA 2900024O10 gene	440		0.410256
I730005E14	LanC (bacterial lantibiotic synthetase component C)-like 1	440		0.410256
I920088O22	Hydroxyacylglutathione hydrolase (EC 3.3.2.6) (Glyoxalase II) (Glx II)	440		0.410256
6330403L12	RAB21, member RAS oncogene family	432		0.384615
9630028A03	Rhesus blood group CE and D	432		0.384615
F630104P19	lectin, galactose binding, soluble 3	432		0.384615
F930032C01	erythroblast membrane-associated protein	432		0.384615
0610010N03	glioblastoma amplified sequence	428		0.371795
1100001G14	actin, alpha 1, skeletal muscle	428		0.371795
G830047A19	calpain 6	428		0.371795
F630004K15	SAC1 (supressor of actin mutations 1, homolog)-like (S. cerevisiae)	424		0.358974
M5C1051B14	dishevelled associated activator of morphogenesis 1	424		0.358974
G630007L15	FK506 binding protein 2	424		0.358974
6820444B12	ATP citrate lyase	420		0.346154
4930589M24	RIKEN cDNA 4930589M24 gene	420		0.346154
6720407N21	casein kinase 1, alpha 1	416		0.333333
D130055J01	cell division cycle 42 homolog (S. cerevisiae)	416		0.333333
D930045N08	aquaporin 1	416		0.333333
1300012N20	RAB33B, member of RAS oncogene family	412		0.320513
2610100O16	RAS-related C3 botulinum substrate 1	412		0.320513
2700063F02	transmembrane emp24 protein transport domain containing 9	412		0.320513
6330407N12	RIKEN cDNA 2310067E08 gene	412		0.320513
A630099D02	transmembrane protein 24	412		0.320513
I530023F06	glycophorin A	412		0.320513
9330187I11	RAB1, member RAS oncogene family	412		0.320513
K0C0023F15	Rhesus blood group-associated A glycoprotein	412		0.320513
1110054O15	RIKEN cDNA 1500009M05 gene	408		0.307692
2300003G24	chloride intracellular channel 3	408		0.307692
4930577M16	RIKEN cDNA 4930577M16 gene	408		0.307692
F730207M15	aryl-hydrocarbon receptor repressor	408		0.307692
2310001A20	RIKEN cDNA 2310001A20 gene	400		0.282051
2610018M01	tyrosine 3-monooxygenase/tryptophan 5-monooxygenase activation protein, epsilon polypeptide	400		0.282051
9130231K01	carbonic anhydrase 1	400		0.282051
F830023A05	phosphofurin acidic cluster sorting protein 1	400		0.282051
F830222K15	complement component 4 (within H-2S)	400		0.282051
I730048B17	capping protein (actin filament) muscle Z-line, alpha 1	400		0.282051
I830125G18	biliverdin reductase B (flavin reductase (NADPH))	400		0.282051
0610012H09	guanine nucleotide binding protein, beta 2	400		0.282051
D930031L14	spectrin alpha 1	400		0.282051
C130087D16	alpha glucosidase 2 alpha neutral subunit	396		0.269231
5430407O06	RIKEN cDNA 5730596K20 gene	392		0.25641
I420028O15	amyloid beta (A4) precursor protein	392		0.25641
2510004C07	proteoglycan 2, bone marrow	392		0.25641
D630015I16	ATP-binding cassette, sub-family G (WHITE), member 2	392		0.25641
I1C0015P17	tubulin, alpha 6	392		0.25641
I920045E06	UNR protein homolog [Rattus norvegicus]	392		0.25641
D630003M21	hypothetical Cellular retinaldehyde-binding protein (CRAL)/Triple function domain (TRIO) containing protein	392		0.25641
4930403C20	sorbitol dehydrogenase 1	388		0.24359
A930025C02	solute carrier family 1 (glutamate transporter), member 7	388		0.24359
E430024F21	protein disulfide isomerase associated 3	388		0.24359
0610027A24	annexin A1	388		0.24359
5830416H02	ATP-binding cassette, sub-family G (WHITE), member 3	388		0.24359
E430019F12	ubiquitin protein ligase E3B	388		0.24359
2210407P13	cytochrome b reductase 1	384		0.230769
5730408N07	stomatin	384		0.230769
9630056K19	phosphofructokinase, liver, B-type	384		0.230769
A430106I07	phosphatidylinositol-4-phosphate 5-kinase, type II, alpha	384		0.230769
B430305J03	RAP2B, member of RAS oncogene family	384		0.230769
C030027M18	RAB5B, member RAS oncogene family	384		0.230769
2310061A22	golgi transport 1 homolog B (S. cerevisiae)	384		0.230769
5730525D03	similar to ATPase [Mus musculus]	384		0.230769
2810423G21	deleted in polyposis 1	380		0.217949
5730540K05	leucine rich repeat containing 40	380		0.217949
9530014M23	DNA segment, Chr 4, ERATO Doi 196, expressed	380		0.217949
9630005C02	ARP3 actin-related protein 3 homolog B (yeast)	380		0.217949
C230038H01	phospholipid scramblase 4	380		0.217949
E430007E05	ADP-ribosylation factor-like 6 interacting protein 5	380		0.217949
I530025O15	lectin, galactose binding, soluble 9	380		0.217949
2210010L24	solute carrier family 40 (iron-regulated transporter), member 1	380		0.217949
2210014C07	RAB10, member RAS oncogene family	380		0.217949
4732495G21	RIKEN cDNA 4732495G21 gene	380		0.217949
2810434C24	penta-EF hand domain containing 1	376		0.205128
B230340L13	acetylcholinesterase	376		0.205128
C130086F02	vesicle-associated membrane protein, associated protein B and C	376		0.205128
I530028C08	guanine nucleotide binding protein (G protein), gamma 5 subunit	376		0.205128
E130013H21	cyclic nucleotide phosphodiesterase 1	376		0.205128
F830021E08	hypothetical protein	376		0.205128
1110012F06	phospholipid scramblase 1	372		0.192308
A330035H04	acyl-CoA synthetase long-chain family member 6	372		0.192308
B230117D02	progesterone receptor membrane component 2	372		0.192308
C430023F06	synaptophysin-like protein	372		0.192308
M5C1028J20	guanine nucleotide binding protein, alpha q polypeptide	372		0.192308
1810045N15	thioredoxin 1	372		0.192308
I530029C04	phosphoglycerate kinase 1	372		0.192308
I420010J21	guanine nucleotide binding protein, alpha inhibiting 2	372		0.192308
5730523J24	RIKEN cDNA 2310061B02 gene	368		0.179487
A830080D04	retinitis pigmentosa 2 homolog (human)	368		0.179487
B130049I05	CD44 antigen	368		0.179487
C630002J01	protein kinase, cAMP dependent regulatory, type I, alpha	368		0.179487
D430025P04	solute carrier family 19 (sodium/hydrogen exchanger), member 1	368		0.179487
F630036C17	RAB5C, member RAS oncogene family	368		0.179487
I730028L04	malate dehydrogenase 2, NAD (mitochondrial)	368		0.179487
1500001M02	myosin light chain, regulatory B	368		0.179487
A430073N19	prolactin induced protein	368		0.179487
C430018A09	Scm-like with four mbt domains 2	368		0.179487
D830031O07	proteasome (prosome, macropain) subunit, alpha type 4	368		0.179487
A230053J20	T-box 19	364		0.166667
C130080H12	membrane protein, palmitoylated	364		0.166667
C430002D13	tropomyosin 4	364		0.166667
E430013F20	moesin	364		0.166667
E430019G24	hydroxysteroid (17-beta) dehydrogenase 12	364		0.166667
E430021P14	RIKEN cDNA 2610034N24 gene	364		0.166667
I0C0003G06	actinin alpha 4	364		0.166667
5730414A08	GLI pathogenesis-related 2	364		0.166667
0610011P10	ATPase, H+ transporting, lysosomal (vacuolar proton pump) 16 kDa	364		0.166667
9330180C14	arylacetamide deacetylase-like 1	360		0.153846
E430025I06	solute carrier family 16 (monocarboxylic acid transporters), member 1	360		0.153846
F930045M02	erythrocyte protein band 4.2	360		0.153846
G830015A09	phosphatidylinositol binding clathrin assembly protein	360		0.153846
9330148M11	RAB2, member RAS oncogene family	360		0.153846
A530029A01	RIKEN cDNA 1110038D17 gene	356		0.141026
A930014C21	SH3 domain binding glutamic acid-rich protein like 2	356		0.141026
D630026N14	guanine nucleotide binding protein, alpha 14	356		0.141026
F430203M01	erythrocyte protein band 4.9	356		0.141026
F830008A12	guanine nucleotide binding protein, beta 1	356		0.141026
2610507K20	solute carrier family 14 (urea transporter), member 1	356		0.141026
I730044C04	solute carrier family 29 (nucleoside transporters), member 1	356		0.141026
C130037I06	beta-1,3-glucuronyltransferase 2 (glucuronosyltransferase S)	352		0.128205
C130069H12	heat shock protein 8	352		0.128205
D630012F03	potassium channel, subfamily K, member 5	352		0.128205
E430021K02	proteasome (prosome, macropain) subunit, alpha type 7	352		0.128205
C330007I17	RIKEN cDNA 1110006I15 gene	348		0.115385
I920065C02	annexin A4	348		0.115385
I920160L24	prolyl 4-hydroxylase, beta polypeptide	348		0.115385
F630119B11	Kirsten rat sarcoma oncogene 2, expressed	348		0.115385
C820020D17	thioredoxin domain containing 1	344		0.102564
D030073H22	adenylosuccinate lyase	344		0.102564
9530086C08	ankyrin 3, epithelial	344		0.102564
D030052C04	Bcl2-associated athanogene 2	340		0.0897436
1500012M15	malate dehydrogenase 1, NAD (soluble)	340		0.0897436
A530024L06	DNA segment, Chr 2, Brigham & Women's Genetics 1356 expressed	336		0.0769231
C730034O22	2-deoxyribose-5-phosphate aldolase homolog (C. elegans)	336		0.0769231
E130103M11	actin related protein 2/3 complex, subunit 5	336		0.0769231
2410046K13	peroxiredoxin 1	336		0.0769231
4732491B11	expressed sequence AI848100	336		0.0769231
4933417I20	ALDOLASE 1, A ISOFORM homolog [Mus musculus]	336		0.0769231
E430001M17	RAS related protein 1b	336		0.0769231
G730021G09	calcium binding protein 39	332		0.0641026
K230302K02	Similar to hepatocellular carcinoma-associated antigen 59	332		0.0641026
0610011M11	aldolase 1, A isoform	332		0.0641026
D330017D22	nucleoporin 188	328		0.0512821
3222402K23	calnexin	328		0.0512821
4930425F11	vacuolar protein sorting 13A (yeast)	324		0.0384615
F430008F11	Plasma membrane calcium-transporting ATPase 4 (EC 3.6.3.8) (PMCA4) (Plasma membrane calcium pump isoform 4) (Plasma membrane calcium ATPase isoform 4) homolog [Rattus norvegicus]	324		0.0384615
C730027E14	RIKEN cDNA C730027E14 gene	320		0.025641
B430113A10	toll-like receptor adaptor molecule 2	320		0.025641
A830061E14	HEPARAN SULFATE D-GLUCOSAMINYL 3-O-SULFOTRANSFERASE-2 (EC 2.8.2.23) homolog [Homo sapiens]	320		0.025641
C730019N20	arginase 1, liver	316		0.0128205
D130029A20	solute carrier family 2 (facilitated glucose transporter), member 4	316		0.0128205
E030016B05	embryonic epithelial gene 1	312		0
I920182B22	helicase, lymphoid specific	308		-0.0128205
2900001K03	clusterin	308		-0.0128205
4933425L11	fructose-bisphosphate aldolase (EC 4.1.2.13) A homolog [Mus musculus]	304		-0.025641
4930432E11	RIKEN cDNA 4930432E11 gene	300		-0.0384615
C920030J24	tropomyosin 3, gamma	296		-0.0512821
	Negative Control
2510001J03	Duffy blood group reacted with anti-Pys25 mAb#16 (ASC1=316, ASC2=308, Average=312)	312		0
ASC: AlphaScreen Counts, each biotinylated recombinant membrane protein was reacted with P. yoelii XL extracts and anti-PyEBL R1-6 mouse antibody [Otsuki PNAS 2009].
NC: Negative control, biotinylated recombinant Duffy blood group was reacted with P. yoelii XL extracts and anti-Pys25 mAb#16 antibody [Tsuboi Infect Imun 1997].
AS Signal: (ASC - Average ASC of NC) / Average ASC of NC
AS Signal >=1.0 in red were selected for the second screening.
